# Supplementary material
Source: PubMed Central journal article supplement (PMC3841791)
Supplement: supp_00108.2013_tableS2.pdf [file supp_00108.2013_tableS2.pdf]

**Supplemental table 2.** Biological functions activated in DA rats compared with congenic strains.

|                                                                                                                 | <b>Functions activated in DA (number of genes affected) <sup>A</sup></b>                                                                                                                       |
|-----------------------------------------------------------------------------------------------------------------|------------------------------------------------------------------------------------------------------------------------------------------------------------------------------------------------|
| cell migration and proliferation                                                                                | <b>proliferation</b> of cells (241), muscle cells (36)                                                                                                                                         |
|                                                                                                                 | <b>quantity</b> of cells (145), blood cells (112), mononuclear leukocytes (79), lymphocytes (76), T lymphocytes (56), helper T lymphocytes (23)                                                |
|                                                                                                                 | cell <b>movement</b> (177) of leukocytes (88), phagocytes (71), myeloid cells (69), granulocytes (49), mononuclear leukocytes (48), neutrophils (45)                                           |
|                                                                                                                 | <b>migration</b> of cells (164), leukocytes (97), phagocytes (43), mononuclear leukocytes (34), myeloid cells (23), granulocytes (22), neutrophils (20), tumor cells (20)                      |
|                                                                                                                 | <b>invasion</b> by cells (70), tumor cells (22), epithelial cell lines (7)                                                                                                                     |
|                                                                                                                 | <b>homing</b> of cells (60), leukocytes (46)                                                                                                                                                   |
|                                                                                                                 | <b>chemotaxis</b> of cells (57), leukocytes (42), myeloid cells (40), phagocytes (39), granulocytes (28), neutrophils (26)                                                                     |
|                                                                                                                 | <b>recruitment</b> of cells (46), leukocytes (44), phagocytes (37), myeloid cells (30), granulocytes (28), neutrophils (26)                                                                    |
|                                                                                                                 | <b>adhesion</b> of blood cells (52), immune cells (47), phagocytes (21), granulocytes (19), neutrophils (14)                                                                                   |
|                                                                                                                 | <b>binding</b> of cells (66), leukocytes (29), phagocytes (18), granulocytes (13), neutrophils (11), smooth muscle cells (7)                                                                   |
|                                                                                                                 | cell <b>rolling</b> of granulocytes (9), neutrophils (7)                                                                                                                                       |
|                                                                                                                 | cell <b>spreading</b> of blood cells (12), phagocytes (9), neutrophils (8)                                                                                                                     |
|                                                                                                                 | <b>transmigration</b> of leukocytes (17)                                                                                                                                                       |
|                                                                                                                 | <b>extravasation</b> of myeloid cells (7), granulocytes (6)                                                                                                                                    |
|                                                                                                                 | <b>shape change</b> of blood cells (16), leukocytes (14), granulocytes (10)                                                                                                                    |
| <b>accumulation</b> of granulocytes (14)                                                                        |                                                                                                                                                                                                |
| <b>infiltration</b> of myeloid cells (29), granulocytes (26), neutrophils (23)                                  |                                                                                                                                                                                                |
| cell function                                                                                                   | <b>activation</b> of cells (98), blood cells (81), leukocytes (71), lymphocytes (41), phagocytes (37), T lymphocytes (34), myeloid cells (33), antigen presenting cells (32), macrophages (21) |
|                                                                                                                 | <b>function</b> of blood cells (79), leukocytes (77)                                                                                                                                           |
|                                                                                                                 | <b>immune response</b> of cells (41), phagocytes (29)                                                                                                                                          |
|                                                                                                                 | <b>metabolism</b> of reactive oxygen species (54), eicosanoid (27)                                                                                                                             |
|                                                                                                                 | <b>synthesis</b> of reactive oxygen species (50), eicosanoid (24), leukotriene (11)                                                                                                            |
|                                                                                                                 | <b>engulfment</b> of cells (35), blood cells (24), myeloid cells (23), phagocytes (22), antigen presenting cells (19)                                                                          |
|                                                                                                                 | <b>phagocytosis</b> of cells (31), blood cells (23), myeloid cells (22), phagocytes (21), antigen presenting cells (18), macrophages (17), red blood cells (9)                                 |
|                                                                                                                 | <b>uptake</b> of cells (8)                                                                                                                                                                     |
|                                                                                                                 | <b>response</b> of phagocytes (31), antigen presenting cells (29), myeloid cells (29), granulocytes (20)                                                                                       |
|                                                                                                                 | <b>aggregation</b> of cells (31), blood cells (23), blood platelets (20)                                                                                                                       |
| <b>cytotoxicity</b> of cells (27), leukocytes (21)                                                              |                                                                                                                                                                                                |
| angiogenesis                                                                                                    | <b>development</b> of cardiovascular system (102), blood vessel (87), cardiovascular tissue (36), endothelial tissue (34), endothelial cell (32)                                               |
|                                                                                                                 | <b>differentiation</b> of blood cells (62)                                                                                                                                                     |
|                                                                                                                 | <b>vasculogenesis</b> (68)                                                                                                                                                                     |
| disease / disease process                                                                                       | rheumatic disease (108), arthritis (103), experimentally-induced arthritis (25)                                                                                                                |
|                                                                                                                 | inflammatory response (93), inflammation of organ (74), inflammation of respiratory system component (38)                                                                                      |
|                                                                                                                 | hypersensitive reaction (75), delayed hypersensitive reaction (27), hypersensitivity reaction type II (4)                                                                                      |
|                                                                                                                 | lung tumor (58), mammary tumor (83)                                                                                                                                                            |
| other vascular disease (75), dermatitis (50), atherosclerosis (47), damage of liver (26), damage of kidney (15) |                                                                                                                                                                                                |

| <b>Functions inhibited in DA (number of genes affected) <sup>B</sup></b> |                                                                          |
|--------------------------------------------------------------------------|--------------------------------------------------------------------------|
| lipid                                                                    | quantity of adiponectin (9)                                              |
| metabolism                                                               | metabolism of acylglycerol (21), triacylglycerol (19)                    |
| detoxification                                                           | joining of glutathione (7)                                               |
| development                                                              | breakage of blood vessel (5)                                             |
| disease                                                                  | disease process infection of mammalia (47), obesity (47), mortality (19) |

<sup>A</sup> z-scores = 2.00 to 4.35; p-values =  $8.02 \times 10^{-5}$  to  $2.55 \times 10^{-22}$

<sup>B</sup> z-scores = -2.11 to -3.40; p-values =  $3.77 \times 10^{-5}$  to  $1.71 \times 10^{-10}$
